# Supplementary material for: Analysis of Practical Identifiability of a Viral Infection Model
Source: PubMed Central journal article supplement (PMC5201286; doi:10.1371/journal.pone.0167568), 2016-12-30
Supplement: pone.0167568.s003.pdf [file pone.0167568.s003.pdf]

# Analysis of practical identifiability of a viral infection model

Van Kinh Nguyen<sup>1,2,3</sup>, Frank Klawonn<sup>4,5</sup>, Rafael Mikolajczyk<sup>6,7,8,9</sup>, Esteban A. Hernandez-Vargas<sup>1,\*</sup>

**1** Systems Medicine of Infectious Diseases, Department of Systems Immunology and Braunschweig Integrated Centre of Systems Biology, Helmholtz Centre for Infection Research, Braunschweig, Germany, **2** Epidemiology Department, Ho Chi Minh University of Medicine and Pharmacy, Ho Chi Minh, Vietnam. **3** PhD Programme “Epidemiology”, Braunschweig-Hannover, Germany **4** Biostatistics, Helmholtz Centre for Infection Research, Braunschweig, Germany, **5** Department of Computer Science, Ostfalia University, Wolfenbüttel, Germany, **6** Epidemiological and Statistical Methods, Helmholtz Centre for Infection Research, Braunschweig, Germany. **7** German Centre for Infection Research, site Hannover-Braunschweig, Germany **8** Hannover Medical School, Hannover, Germany **9** [Institute of] Medical Epidemiology, Biometry and Informatics, Martin-Luther University Halle-Wittenberg, Germany

\* [esteban.vargas@helmholtz-hzi.de](mailto:esteban.vargas@helmholtz-hzi.de)

## S3 Text

**Implementation of robust estimation in ODE models.** A viral load data set collected daily with ten replicates per day is generated. Outliers data points are added by sampling from a skew normal distribution which resulted in outliers different in one order of magnitude; both left- and right-skew outliers are considered, i.e., skew parameter  $\alpha = \pm 10$ . The robust estimation steps are then conducted as in [1]: (1) Obtain the parameter estimates using the Least squares (LS) method, scale the residuals with mean absolute deviation from the median (MAD); (2) Compute Huber weights [2] based on the scaled residuals; (3) Optimize model with weighted least squares (WLS) using Huber weights, compute new scaled residuals; (4) Iterate steps 2-3 until the maximum changes in Huber weights from one iteration to the previous is not greater than a small threshold, e.g., 0.05; (5) Repeat steps 2-4 but instead using Tukey’s bisquare weight function and a smaller convergence threshold, e.g., 0.01. The code skeleton can be found on-line at [this link](#). There are high demands of computational cost but there is virtually no gain in parameter accuracy of the robust estimates compared to the normal LS estimates (Fig. T3).

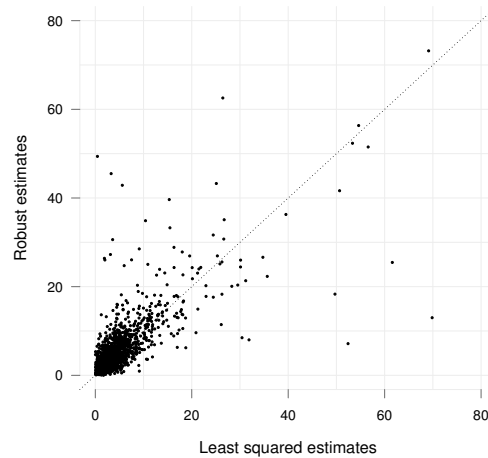

**Figure T3. Robust vs. least squares estimates.** Robust and LS are tested on 2000 datasets with outliers. Mahalanobis distance from each set of parameters to the reference one is presented.

## References

1. Li G. In: Robust Regression. John Wiley & Sons, Inc.; 2006. p. 281–343.
2. Huber PJ, Ronchetti EM. Robust Statistics. Wiley Series in Probability and Statistics. Wiley; 2009.
