# Supplementary material for: Analysis of Practical Identifiability of a Viral Infection Model
Source: PubMed Central journal article supplement (PMC5201286; doi:10.1371/journal.pone.0167568), 2016-12-30
Supplement: pone.0167568.s004.pdf [file pone.0167568.s004.pdf]

# Analysis of practical identifiability of a viral infection model

Van Kinh Nguyen<sup>1,2,3</sup>, Frank Klawonn<sup>4,5</sup>, Rafael Mikolajczyk<sup>6,7,8,9</sup>, Esteban A. Hernandez-Vargas<sup>1,\*</sup>

**1** Systems Medicine of Infectious Diseases, Department of Systems Immunology and Braunschweig Integrated Centre of Systems Biology, Helmholtz Centre for Infection Research, Braunschweig, Germany, **2** Epidemiology Department, Ho Chi Minh University of Medicine and Pharmacy, Ho Chi Minh, Vietnam. **3** PhD Programme “Epidemiology”, Braunschweig-Hannover, Germany **4** Biostatistics, Helmholtz Centre for Infection Research, Braunschweig, Germany, **5** Department of Computer Science, Ostfalia University, Wolfenbüttel, Germany, **6** Epidemiological and Statistical Methods, Helmholtz Centre for Infection Research, Braunschweig, Germany. **7** German Centre for Infection Research, site Hannover-Braunschweig, Germany **8** Hannover Medical School, Hannover, Germany **9** [Institute of] Medical Epidemiology, Biometry and Informatics, Martin-Luther University Halle-Wittenberg, Germany

\* [esteban.vargas@helmholtz-hzi.de](mailto:esteban.vargas@helmholtz-hzi.de)

## S4 Text

**Implementation of simulation and extrapolation approach.** Let  $t$  denote the true time point when an observed value actually happens; the corresponding time point in experimental scale is  $t^* = t + v$ ,  $v \sim N(0, \Sigma_v)$ , where  $v$  is an unknown time shift. The following steps are done (adapted from [1]): (1) Define  $\Sigma_v$  such that  $t$  varies in a biological range according to the model; (2) Generate a sequence of  $\lambda_i$  in  $\{0, \dots, K\}$ ; (3) For each  $\lambda_i$ , add time shifts to the original data with the noise equal to  $\lambda_i \Sigma_v$  and fit the model. The new time shift for each data point thus is equal to  $(1 + \lambda_i) \Sigma_v$ ; (4) Repeat step 3  $B$  times ( $B$  sufficiently large) and obtain the average parameter estimates for each  $\lambda_i$ ; (5) Use statistical models to make extrapolation of parameter values at  $\lambda = -1$ .

In the IAV kinetics, the shift  $v$  could be assumed varying from a few minutes to a day which can be illustrated by a truncated normal distribution. The  $\lambda$  sequence length of ten and  $K = 1$  are chosen such that the simulated data have realistic time scale and maximum time shift of one day,  $B = 1000$  simulations is used. The results showed that applying simulation step in the model resulted in a non-linear pattern of parameter estimates over  $\lambda$  (Fig. T4). Thus it is not possible to make extrapolation properly to where theoretically no error at  $\lambda = -1$ .

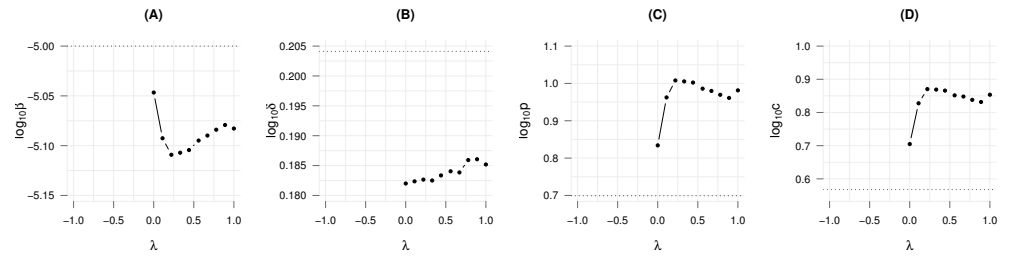

**Figure T4. Simulation and extrapolation approach in the target-cell limited model.** The horizontal dashed line corresponds to the reference values, each dot is the mean of 1000 simulations of time shifts.

## References

1. Althubaiti A, Donev A. Non-Gaussian Berkson errors in bioassay. *Statistical Methods in Medical Research*. 2012;.
