# Supplementary material for: Analysis of Practical Identifiability of a Viral Infection Model
Source: PubMed Central journal article supplement (PMC5201286; doi:10.1371/journal.pone.0167568), 2016-12-30
Supplement: pone.0167568.s005.pdf [file pone.0167568.s005.pdf]

# Analysis of practical identifiability of a viral infection model

Van Kinh Nguyen<sup>1,2,3</sup>, Frank Klawonn<sup>4,5</sup>, Rafael Mikolajczyk<sup>6,7,8,9</sup>, Esteban A. Hernandez-Vargas<sup>1,\*</sup>

**1** Systems Medicine of Infectious Diseases, Department of Systems Immunology and Braunschweig Integrated Centre of Systems Biology, Helmholtz Centre for Infection Research, Braunschweig, Germany, **2** Epidemiology Department, Ho Chi Minh University of Medicine and Pharmacy, Ho Chi Minh, Vietnam. **3** PhD Programme “Epidemiology”, Braunschweig-Hannover, Germany **4** Biostatistics, Helmholtz Centre for Infection Research, Braunschweig, Germany, **5** Department of Computer Science, Ostfalia University, Wolfenbüttel, Germany, **6** Epidemiological and Statistical Methods, Helmholtz Centre for Infection Research, Braunschweig, Germany. **7** German Centre for Infection Research, site Hannover-Braunschweig, Germany **8** Hannover Medical School, Hannover, Germany **9** [Institute of] Medical Epidemiology, Biometry and Informatics, Martin-Luther University Halle-Wittenberg, Germany

\* [esteban.vargas@helmholtz-hzi.de](mailto:esteban.vargas@helmholtz-hzi.de)

## S5 Text

**Description of search results from the PubMed Central database.** Using the syntax provided by PubMed Central [1], we conducted a search of scientific works on Pubmed Central database from 1990 to March 2016. The number of papers that used the keywords `ordinary differential equation(s) explicitly` in the paper formed the first category *ODEs*. By explicitly, we mean the search terms of interested *must* appeared in the title, *or* the abstracts *or* within the main text, *and* excluding those have it in references *or* if the paper is a review paper. To obtain the number of papers that conducted parameter estimation, the following keywords and their variation must be used explicitly, including `estimat*` *or* `quanti*`, *or* `fit*`. For the last category, the variations of the keyword `identifi*` must be used explicitly.

## References

1. Pubmed Central. PMC Help - NCBI Bookshelf; 2016.
